# Supplementary material
Source: PubMed Central journal article supplement (PMC8481092)
Supplement: mmc1.pdf [file mmc1.pdf]

## Supplemental information

### Role of miR-2392 in driving SARS-CoV-2 infection

J. Tyson McDonald, Francisco J. Enguita, Deanne Taylor, Robert J. Griffin, Waldemar Priebe, Mark R. Emmett, Mohammad M. Sajadi, Anthony D. Harris, Jean Clement, Joseph M. Dybas, Nukhet Aykin-Burns, Joseph W. Guarnieri, Larry N. Singh, Peter Grabham, Stephen B. Baylin, Aliza Yousey, Andrea N. Pearson, Peter M. Corry, Amanda Saravia-Butler, Thomas R. Aunins, Sadhana Sharma, Prashant Nagpal, Cem Meydan, Jonathan Foon, Christopher Mozsary, Bianca Cerqueira, Viktorija Zaksas, Urminder Singh, Eve Syrkin Wurtele, Sylvain V. Costes, Gustavo Gastão Davanzo, Diego Galeano, Alberto Paccanaro, Suzanne L. Meinig, Robert S. Hagan, Natalie M. Bowman, UNC COVID-19 Pathobiology Consortium, Matthew C. Wolfgang, Selin Altinok, Nicolae Sapoval, Todd J. Treangen, Pedro M. Moraes-Vieira, Charles Vanderburg, Douglas C. Wallace, Jonathan C. Schisler, Christopher E. Mason, Anushree Chatterjee, Robert Meller, and Afshin Beheshti

## **Supplemental Information**

### **Role of miR-2392 in Driving SARS-CoV-2 Infection**

J. Tyson McDonald, Francisco Javier Enguita, Deanne Taylor, Robert J. Griffin, Waldemar Priebe, Mark R. Emmett, Mohammad M. Sajadi, Anthony D. Harris, Jean Clement, Joseph M. Dybas, Nukhet Aykin-Burns, Joseph W. Guarnieri, Larry N. Singh, Peter Grabham, Stephen B. Baylin, Aliza Yousey, Andrea N. Pearson, Peter M. Corry, Amanda Saravia-Butler, Thomas R. Aunins, Sadhana Sharma, Prashant Nagpal, Cem Meydan, Jonathan Foux, Christopher Mozsary, Bianca Cerqueira, Viktorija Zaksas, Urminder Singh, Eve Syrkin Wurtele, Sylvain V. Costes, Gustavo Gastão Davanzo, Diego Galeano, Alberto Paccanaro, Suzanne L. Meinig, Robert S. Hagan, Natalie M Bowman, UNC COVID- Pathobiology Consortium, Matthew C. Wolfgang, Selin Altinok, Nicolae Sapoval, Todd J. Treangen, Pedro M. Moraes-Vieira, Charles Vanderburg, Douglas C. Wallace, Jonathan Schisler, Christopher E. Mason, Anushree Chatterjee, Robert Meller, Afshin Beheshti

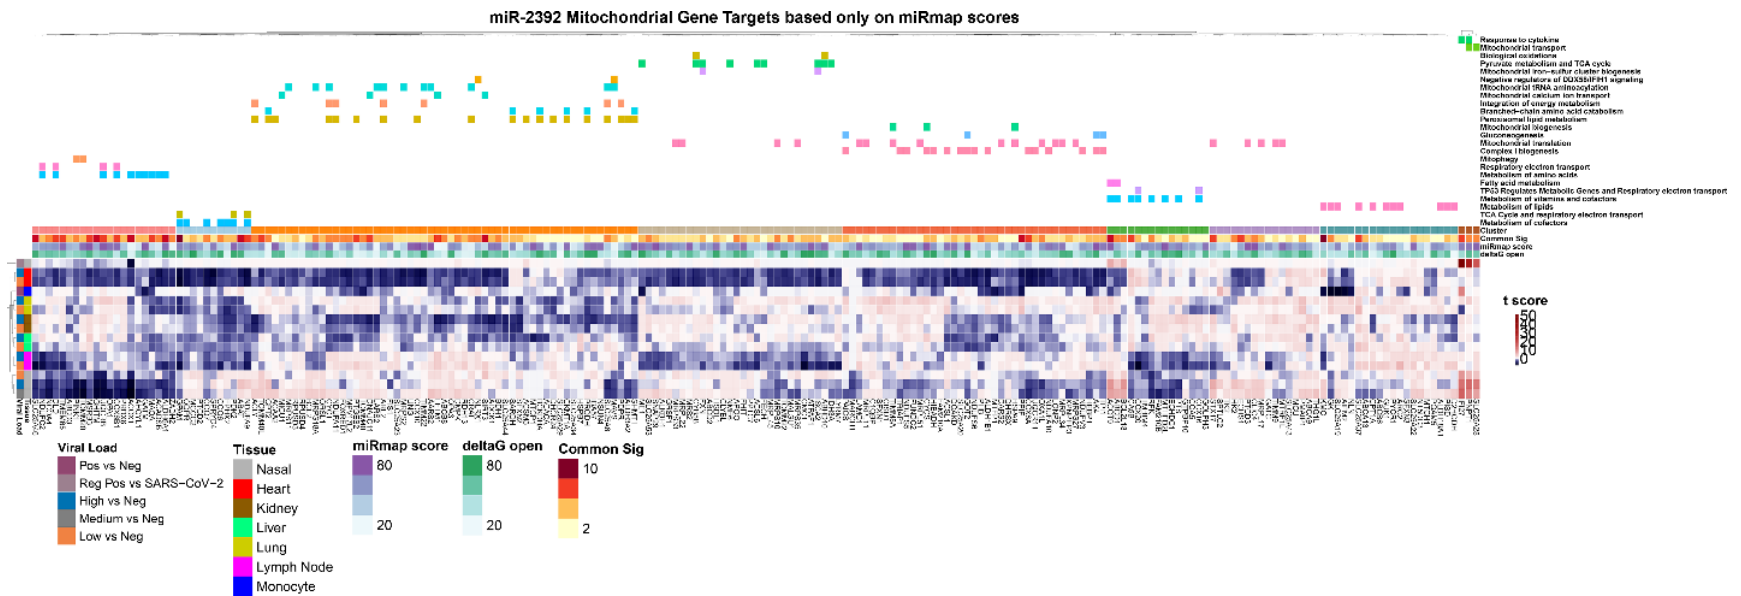

**Figure S1.** Mitochondrial gene targets of miR-2392 and regulated pathways. Related to Figure 3. Differential gene expression analysis for all miR-2392 mitochondrial gene targets significantly expressed in nasopharyngeal swab and autopsy COVID-19 patient tissues. The heatmaps display the t-score statistics for comparing viral load vs negative patient sample for all samples. Main gene clusters were determined from k-means clustering. Nine main gene clusters were determined and ShinyGO (Ge et al., 2020) was utilized to determine the pathways for each cluster which are displayed on the top panel of the heatmap. Differentially expressed genes are shown with at least one comparison demonstrating a significant adjusted p-value ( $FDR < 0.05$ ) when comparing COVID-19 patients (high, medium or low viral loads) to non-infected control patients (none). Mir-2392 gene targets only determined from miRmap.

miR-2392 Inflammation Gene Targets based only on miRmap scores

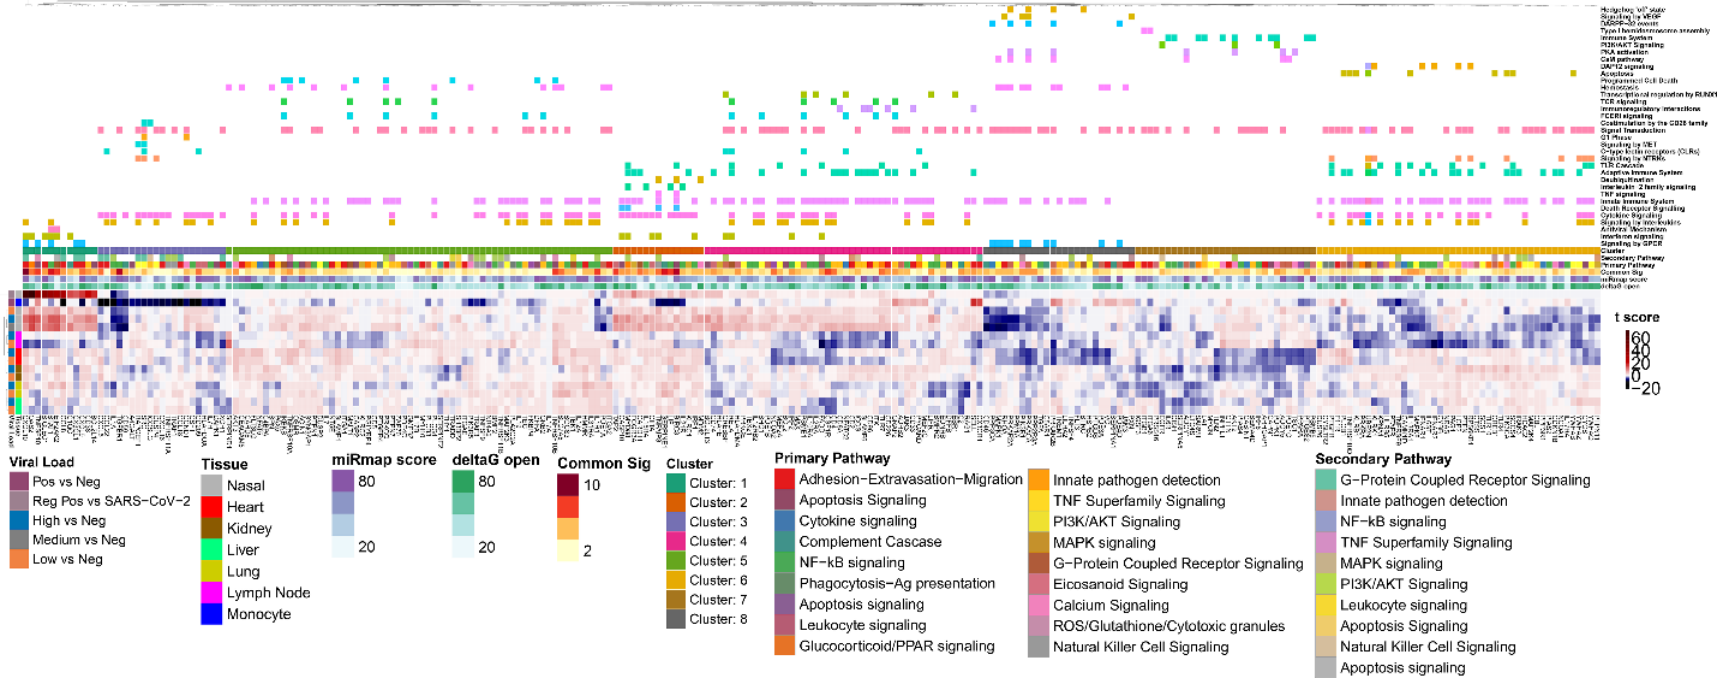

**Figure S2. Inflammatory gene targets of miR-2392 and regulated pathways. Related to Figure 3.** Differential gene expression analysis for all miR-2392 inflammatory gene targets significantly expressed in nasopharyngeal swab and autopsy COVID-19 patient tissues. The heatmaps display the t-score statistics for comparing viral load vs negative patient sample for all samples. Main gene clusters were determined through k-mean clustering. Eight main gene clusters were determined and ShinyGO (Ge et al., 2020) was utilized to determine the pathways for each cluster which are displayed on the top panel of the heatmap. Differentially expressed genes are shown with at least one comparison demonstrating a significant adjusted p-value (FDR<0.05) when comparing COVID-19 patients (high, medium or low viral loads) to non-infected control patients (none). Mir-2392 gene targets only determined from miRmap.

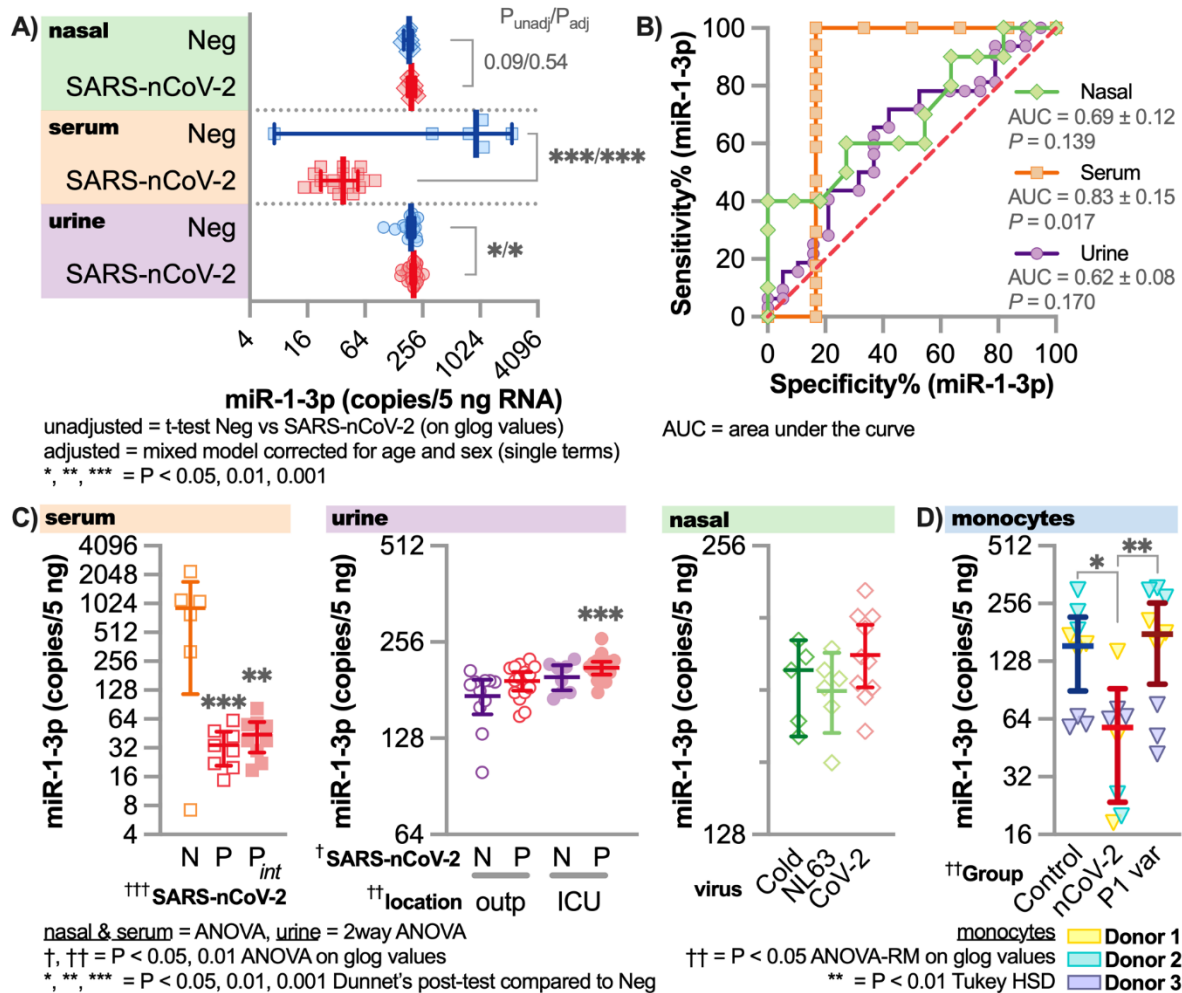

**Figure S3. Circulating miR-1-3p with COVID-19 patients compared to COVID-19 negative patients. Related to Figure 5.** Droplet digital PCR (ddPCR) with specific primer for miR-1-3p was performed on serum, urine, and nasopharyngeal swab samples (including other seasonal coronavirus samples) from COVID-19 positive or negative patients. The miRNA concentration are reported as copies/5ng RNA. **A)** The levels of miRNA-2392 in all tissues from patients grouped as SARS-CoV-2 positive (SARS-nCoV-2) or negative (neg). Unadjusted t-tests comparing the SARS-CoV-2 positive to neg for each tissue are provided and also adjusted statistics comparing the groups with a mixed model corrected for age and sex is provided. **B)** Receiver Operating Characteristic (ROC) curve is provided for miR-1-3p for each tissue comparing SARS-CoV-2 positive to negative patients. **C)** Comparing specific categories within each tissue type between COVID-19 positive or negative patients. N = COVID-19 Negative, P = COVID-19 positive, P<sub>int</sub> = intubated patients, outp = outpatient, ICU = Intensive care unit/inpatient, Cold = Coronaviruses related to the common cold, NL63 = NL63 coronavirus, and CoV-2 = SARS-CoV-2. **D)** The levels of miR-1-3p in monocytes from healthy donors (n = 3) that were infected with SARS-CoV-2 reference strain and P1 variant. Triplicate conditions were done for each donor. For all plots \* =  $p < 0.05$ , \*\* =  $p < 0.01$ , and \*\*\* =  $p < 0.001$ .

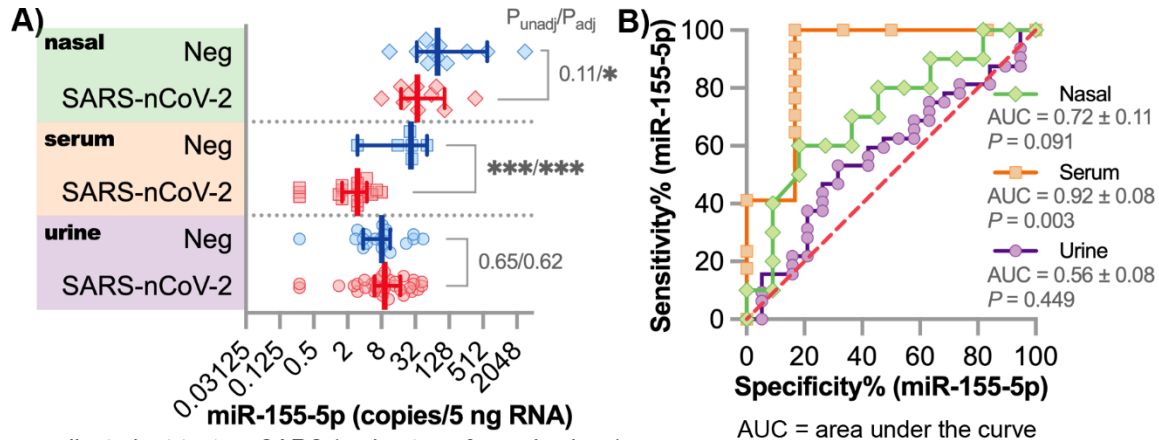

unadjusted = t-test on SARS (on log transformed values)  
 adjusted = mixed model corrected for age and sex (single terms)  
 \*, \*\*, \*\*\* =  $p < 0.05, 0.01, 0.001$

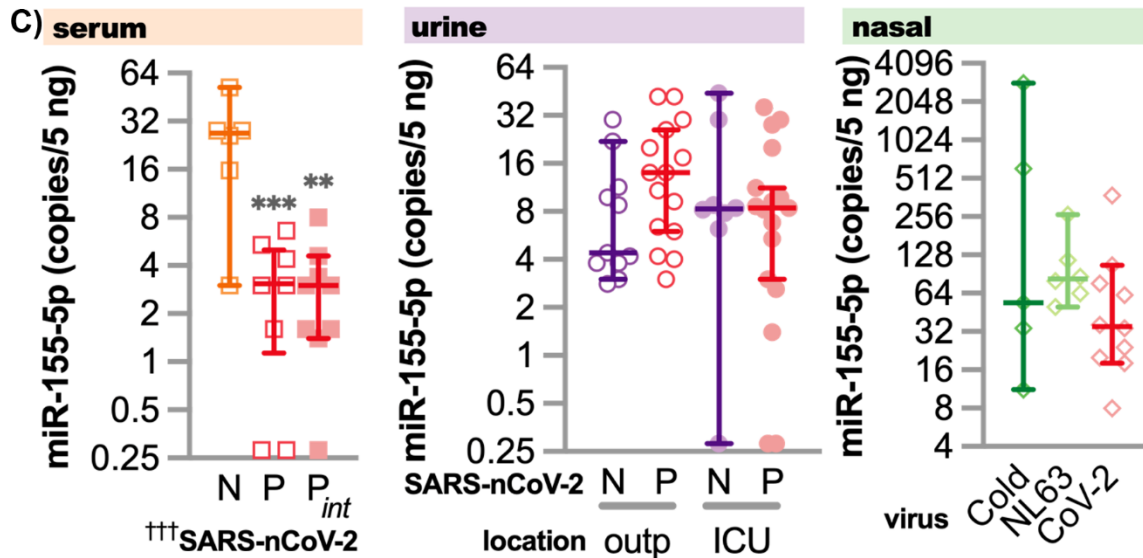

nasal and serum = ANOVA on log values  
 urine = 2-way ANOVA on log values  
 †, †† =  $p < 0.05, 0.01$  from ANOVA  
 \*, \*\*, \*\*\* =  $p < 0.05, 0.01, 0.001$  from Dunnet's post-test compared to Negative

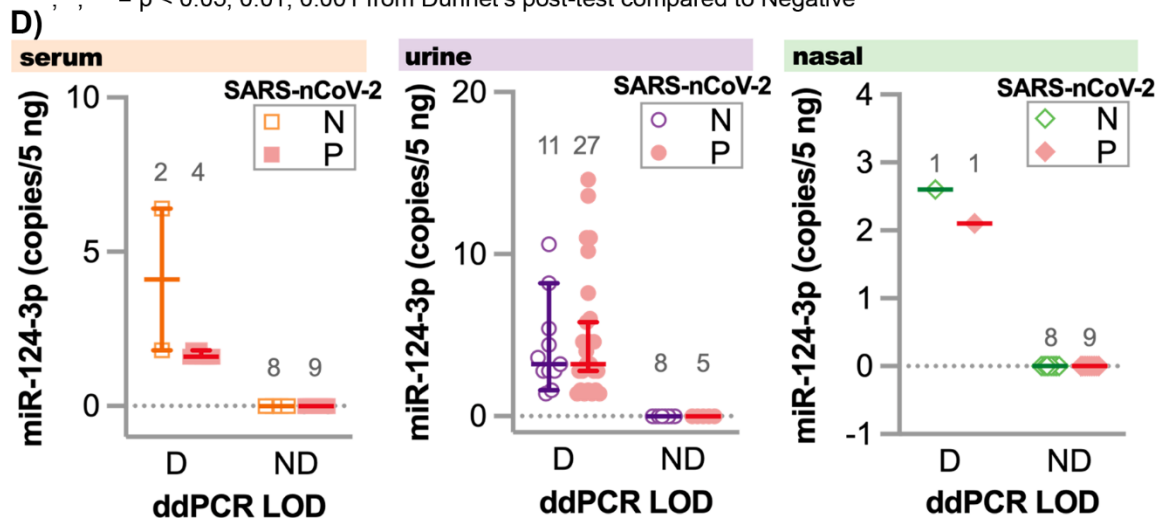

**Figure S4. Circulating miR-155-5p and miR-124-3p with COVID-19 patients compared to COVID-19 negative patients. Related to Figure 5.** Droplet digital PCR (ddPCR) with specific primer for miR-155-5p and miR-124-3p was performed on serum, urine, and nasopharyngeal swab samples (including other seasonal coronavirus samples) from COVID-19 positive or negative patients. The miRNA concentration are reported as copies/5ng RNA. **A)** The levels of miRNA-155-5p in all tissues from patients grouped as SARS-CoV-2 positive (SARS-nCoV-2) or negative (neg). Unadjusted t-tests comparing the SARS-CoV-2 positive to neg for each tissue are provided and also adjusted statistics comparing the groups with a mixed model corrected for age and sex is provided. **B)** Receiver Operating Characteristic (ROC) curve is provided for miR-155-5p for each tissue comparing SARS-CoV-2 positive to negative patients. **C)** Comparing specific categories within each tissue type between COVID-19 positive or negative patients. N = COVID-19 Negative, P = COVID-19 positive, P<sub>int</sub> = intubated patients, outp = outpatient, ICU = Intensive care unit/inpatient, Cold = Coronaviruses related to the common cold, NL63 = NL63 coronavirus, and CoV-2 = SARS-CoV-2. For all plots \* = p < 0.05, \*\* = p < 0.01, and \*\*\* = p < 0.001. **D)** For miR-124-3p, the copies/5ng were either equal to 0 or at extremely low levels close to 0 copies/5ng. To try to determine any statistical differences we categorized the groups as ND = Not Determined which are all 0 values or D = Determined which are values > 0 for both N = negative (open symbols) and P = COVID-19 positive patients samples (closed symbols). The number of patients for each column is shown above the points. No significant differences were observed for any of the sample for miR-124-3p.

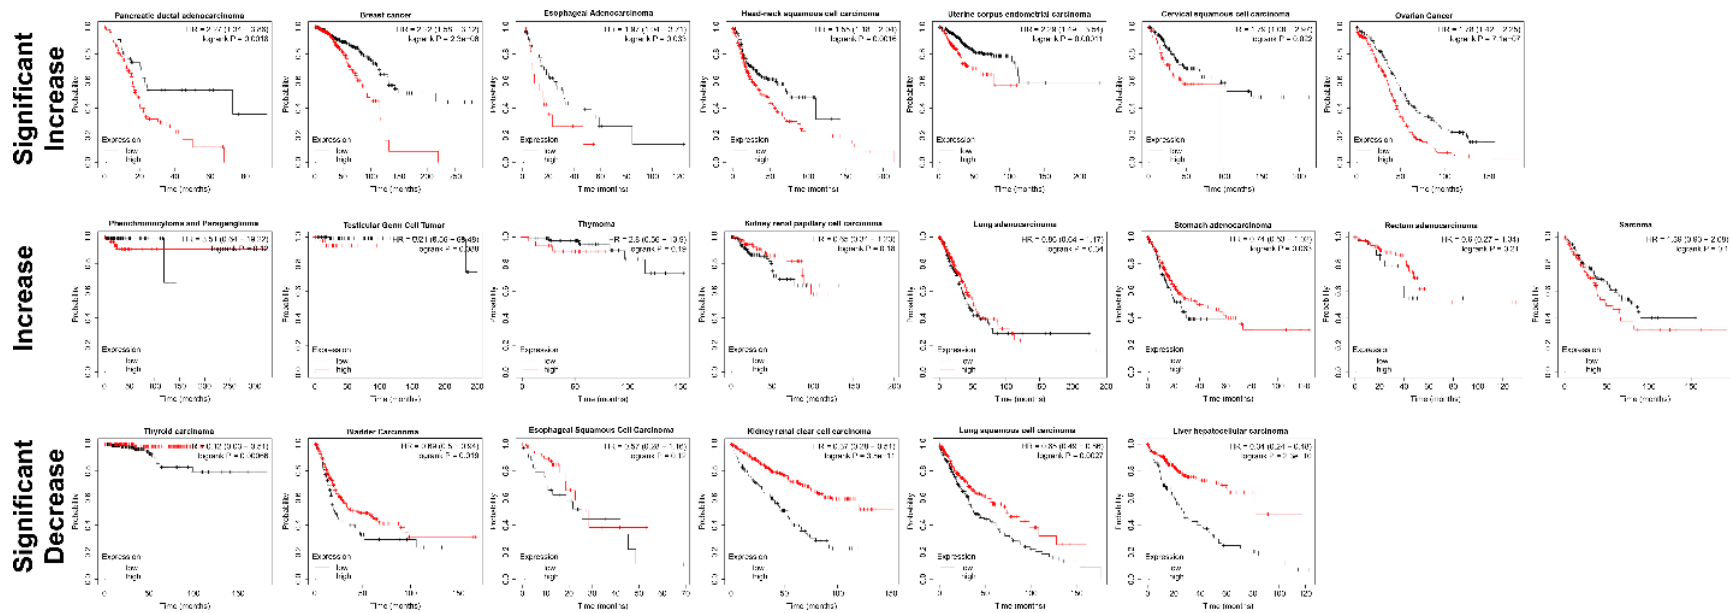

**Figure S5. miR-2392 expression pan-cancer survival analysis. Related to Figure 7.** Kaplan Meier patient survival plots for miR-2392 expression in a pan-cancer analysis was determined utilizing The Kaplan Meier plotter (Nagy et al., 2021). The plots were separated with the top row being cancers which patients had significantly poor survival with high expression of miR-2392, the middle row being cancers which patients had poor survival (but not significant) with high expression of miR-2392, and the bottom row being cancers which patients had significantly better survival with high expression of miR-2392.



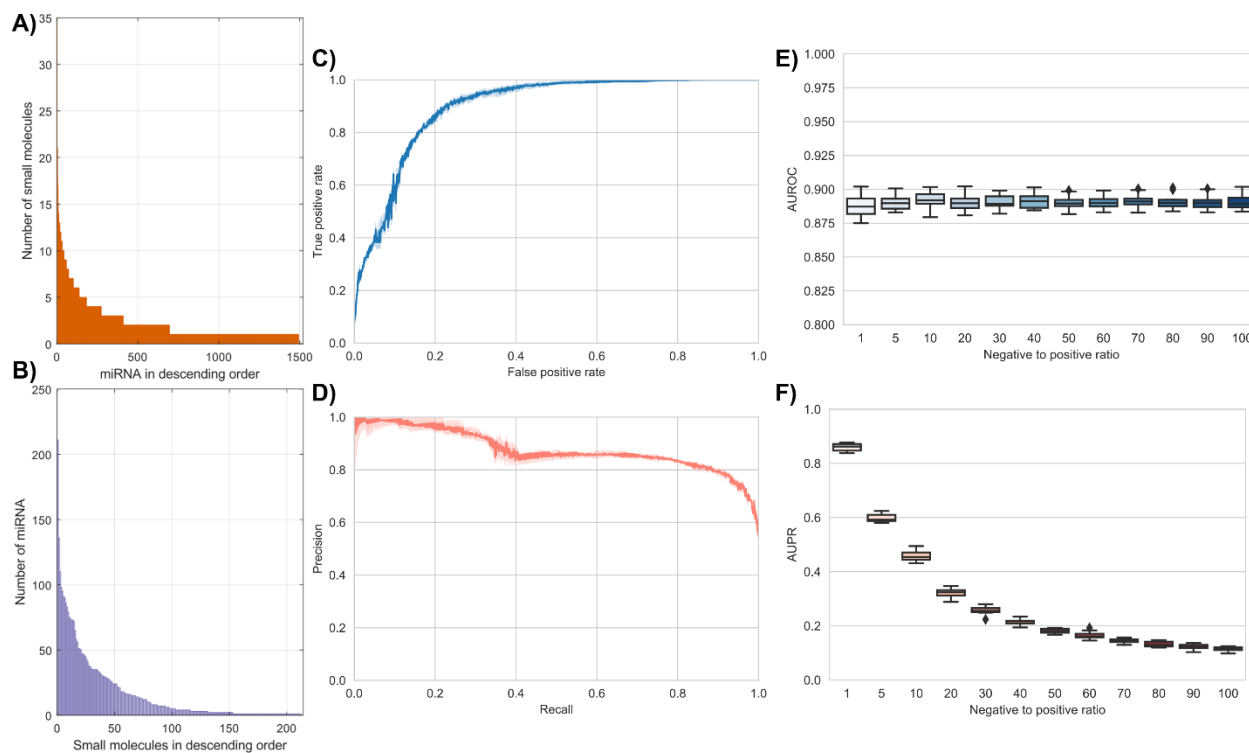

**Figure S6. Small molecules-miRNA dataset statistics and performance at predicting missing small molecule-miRNA on interactions and imbalance related to Figure 7.** A) Number of small molecules associated to miRNAs. B) Number of miRNAs associated to small molecules. C) The mean value of the Receiver Operating Curve (ROC) is shown for a ten-fold cross-validation experiment (dark blue). 95% confidence interval is also shown (light blue). D) The mean value of the Precision-Recall Curve (PRC) is shown for a ten-fold cross-validation experiment (dark salmon). 95% confidence interval is also shown (light salmon). E) Area Under the Receiver Operating Curve (AUROC) was obtained in a ten-fold cross-validation experiment for varying values of the negative to positive label ratio in the test set. F) Area Under the Precision-Recall Curve (AUPRC) was obtained in a ten-fold cross-validation experiment for varying values of the negative to positive label ratio in the test set.

| <b>miRNA target</b> | <b>Primer Annealing temperature</b> | <b>Catalog #</b>       |
|---------------------|-------------------------------------|------------------------|
| hsa-miR-2392        | 53°C                                | Qiagen Cat# YP02104616 |
| hsa-miR-155-5p      | 52°C                                | Qiagen Cat# YP00204308 |
| hsa-miR-124-3p      | 58°C                                | Qiagen Cat# YP00206026 |
| hsa-miR-1-3p        | 53°C                                | Qiagen Cat# YP00204344 |

**Table S1. Annealing temperatures for miRNA primers, related to methods and Figure 5.** Temperatures used for droplet digital PCR to quantify each miRNA target.
